# Supplementary material for: Contraction-actuated thermo-responsive hydrogels accelerate wound healing via mechanosensitive proliferation
Source: Royal Society of Chemistry journal article supplement (doi:10.1039/d5tb02304a), 2025-12-30
Supplement: d5tb02304a1.pdf [file d5tb02304a1.pdf]

Supporting Information

Contraction-Actuated Thermo-Responsive Hydrogels Accelerate Wound Healing  
via Mechanosensitive Proliferation

Yangyang Liu<sup>a</sup>, Huibo Wang<sup>a</sup>, Changliang Wu<sup>a</sup>, Xingang Peng<sup>a</sup>, Junhao Zhang<sup>a</sup>, Shulin  
Liang<sup>a</sup>, Ze Li<sup>a,b\*</sup>, Xiuwen Wu<sup>b\*</sup>, Jianan Ren<sup>b\*</sup>, Peige Wang<sup>a\*</sup>

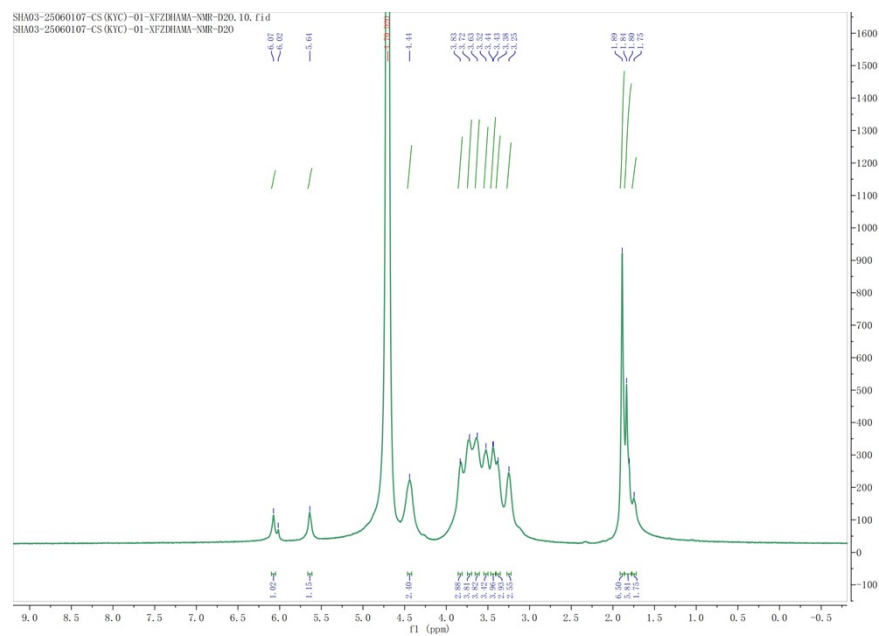

Figure S1. Characteristics of HAMA. NMR spectra of HAMA.

Table S1 The concentration of each component in the HNA hydrogel

|       | HNA <sub>1</sub> | HNA <sub>2</sub> | HNA <sub>3</sub> |
|-------|------------------|------------------|------------------|
| HAMA  | 1%               | 2%               | 3%               |
| NIPAM | 20%              | 25%              | 30%              |
| AA    | 6%               | 8%               | 10%              |

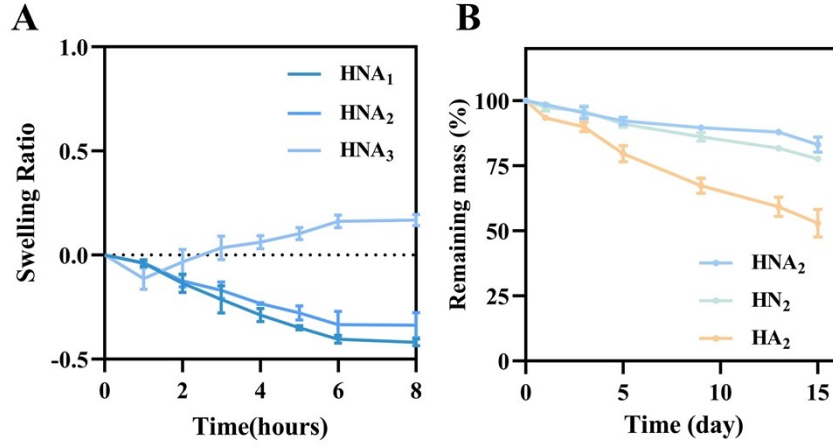

**Figure S2. Material properties of HNA hydrogels.** A) Swelling properties of HNA<sub>1</sub>, HNA<sub>2</sub>, and HNA<sub>3</sub> hydrogels (n=3). B) Degradation rates of HNA, HN, and HA hydrogels in PBS at 37°C (n=3).

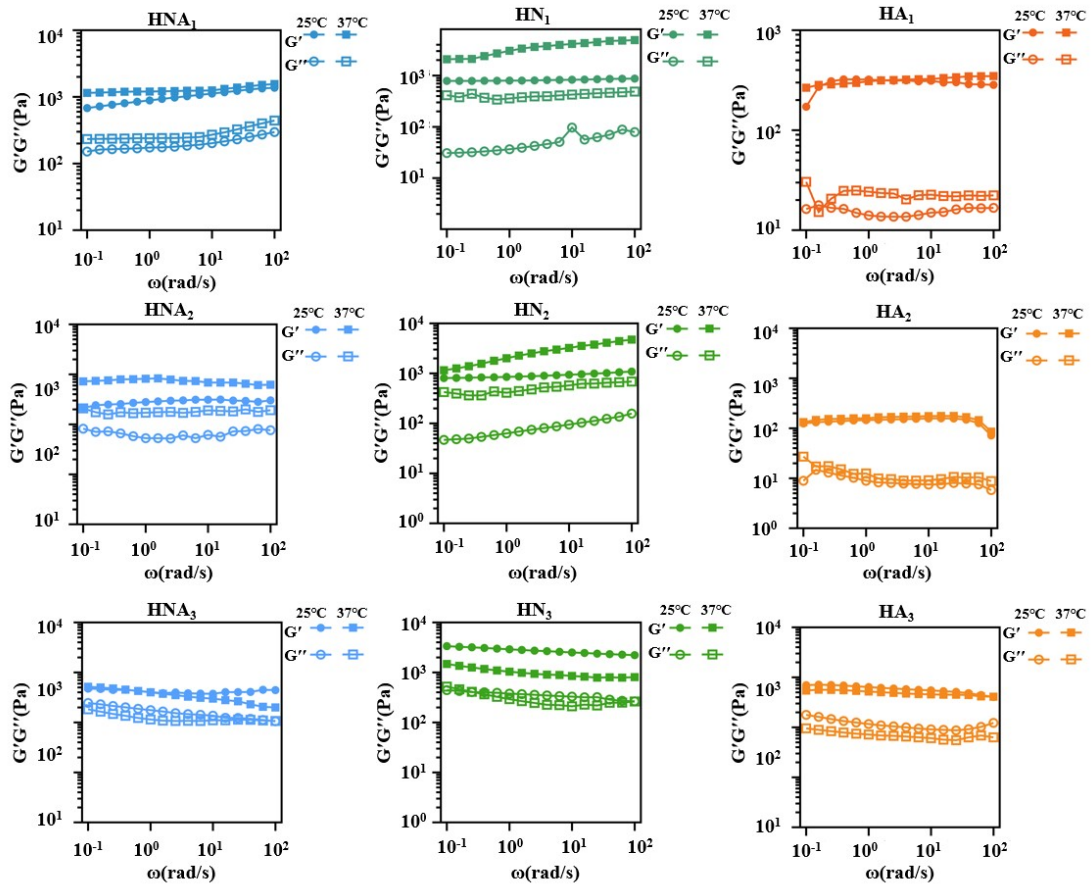

**Figure S3. Material properties of HNA hydrogels.** Rheological behavior of each component of the hydrogel.

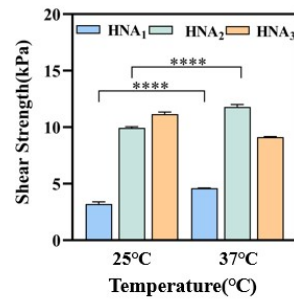

**Figure S4. Material properties of HNA hydrogels.** Adhesive properties of each component hydrogel. \*\*\*\* $p < 0.0001$ .

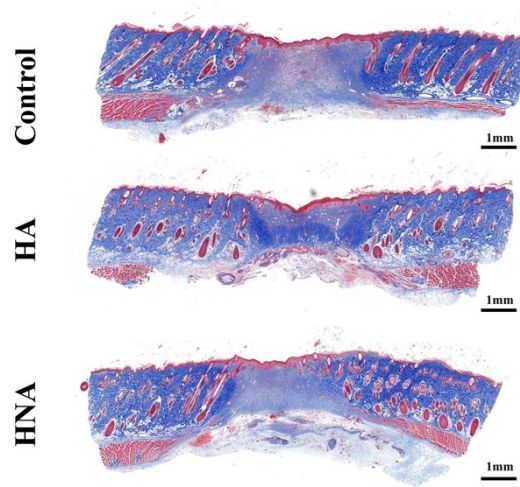

**Figure S5.** Histological evaluation of the wound at day 9. Masson's stain ( $n = 5$ ).

**A**

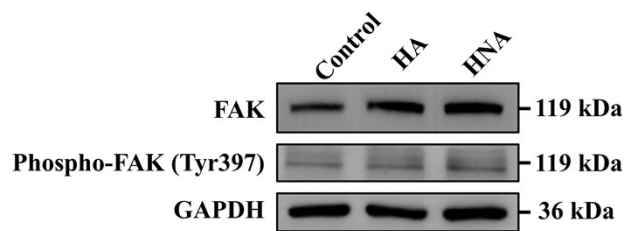

**B**

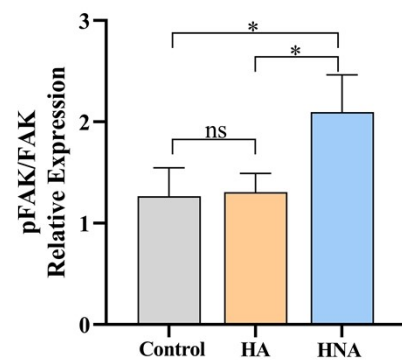

**Figure S6. A · B)** Western blots and quantitative analysis of wounds in the control, HA and HNA groups after 9 days of treatment ( $n = 5$ ). \* $p < 0.05$ , \*\* $p < 0.01$ .
